# Supplementary material
Source: Research Square preprint supplement (doi:10.21203/rs.3.rs-9281660/v1)
Supplement: Supplementary file 1 [file ec6845e45de9faba38058030.pdf]

Multimodal Gene Expression Deep Learning for  
Predicting Sentinel Lymph Node Macro-metastasis  
in Early Breast Cancer: Development and Validation  
in the SCAN-B Cohort

Supplementary materials

**Table S1:** Comparison of clinical characteristics between the development and independent test sets and between patients with negative and positive SLN within each set

| Variables                                             | All<br>(n=4,625) | Development set<br>Positive<br>(n=745) | P<br>value | Effect<br>size      | All<br>(n=2,211) | Independent test set<br>Positive<br>(n=360) | P<br>value | Effect<br>size      | P<br>value | Effect<br>size      |
|-------------------------------------------------------|------------------|----------------------------------------|------------|---------------------|------------------|---------------------------------------------|------------|---------------------|------------|---------------------|
| <b>Age, years, mean(SD)</b>                           | 65.0 (12.4)      | 65.1 (12.4)                            | 0.086      | -0.068 <sup>d</sup> | 65.1 (12.6)      | 63.2 (13.4)                                 | 0.003      | -0.182 <sup>d</sup> | 0.733      | -0.009 <sup>d</sup> |
| <b>Menopausal status, No. (%)</b>                     |                  |                                        |            |                     |                  |                                             |            |                     |            |                     |
| Postmenopausal                                        | 3,464 (79)       | 2,929 (80)                             | 0.076      | 0.027 <sup>V</sup>  | 1,677 (80)       | 250 (74)                                    | < 0.001    | 0.075 <sup>V</sup>  | 0.428      | 0.010 <sup>V</sup>  |
| Premenopausal                                         | 895 (21)         | 735 (20)                               |            |                     | 411 (20)         | 90 (26)                                     |            |                     |            |                     |
| Missing                                               | 266              | 216                                    |            |                     | 123              | 20                                          |            |                     |            |                     |
| <b>Mode of detection, No. (%)</b>                     |                  |                                        |            |                     |                  |                                             |            |                     |            |                     |
| Mammographic                                          | 2,500 (54)       | 2,152 (56)                             | < 0.001    | 0.065 <sup>V</sup>  | 1,196 (54)       | 169 (47)                                    | 0.003      | 0.064 <sup>V</sup>  | 0.882      | 0.002 <sup>V</sup>  |
| Symptomatic                                           | 2,097 (46)       | 1,704 (44)                             |            |                     | 1,011 (46)       | 191 (53)                                    |            |                     |            |                     |
| Missing                                               | 28               | 24                                     |            |                     | 4                | 0                                           |            |                     |            |                     |
| <b>Histological type, No. (%)</b>                     |                  |                                        |            |                     |                  |                                             |            |                     |            |                     |
| ILC                                                   | 631 (14)         | 505 (13)                               | < 0.001    | 0.039 <sup>V</sup>  | 316 (14)         | 64 (18)                                     | 0.029      | 0.040 <sup>V</sup>  | 0.241      | 0.014 <sup>V</sup>  |
| NST                                                   | 3,530 (76)       | 2,964 (76)                             |            |                     | 1,701 (77)       | 274 (76)                                    |            |                     |            |                     |
| Others                                                | 460 (10)         | 407 (11)                               |            |                     | 171 (9)          | 22 (6)                                      |            |                     |            |                     |
| Missing                                               | 4                | 4                                      |            |                     | 1                | 0                                           |            |                     |            |                     |
| <b>Histological grade, No. (%)</b>                    |                  |                                        |            |                     |                  |                                             |            |                     |            |                     |
| I                                                     | 842 (18)         | 742 (19)                               | < 0.001    | 0.039 <sup>V</sup>  | 389 (18)         | 42 (12)                                     | 0.006      | 0.048 <sup>V</sup>  | 0.672      | 0.008 <sup>V</sup>  |
| II                                                    | 2,423 (53)       | 2,003 (52)                             |            |                     | 1,145 (52)       | 201 (57)                                    |            |                     |            |                     |
| III                                                   | 1,344 (29)       | 1,122 (29)                             |            |                     | 662 (30)         | 112 (32)                                    |            |                     |            |                     |
| Missing                                               | 16               | 13                                     |            |                     | 15               | 5                                           |            |                     |            |                     |
| <b>ER, %, mean(SD)</b>                                | 85.7 (30.2)      | 85.3 (30.7)                            | 0.060      | 0.075 <sup>d</sup>  | 85.1 (31.8)      | 87.4 (28.0)                                 | 0.100      | 0.086 <sup>d</sup>  | 0.505      | 0.018 <sup>d</sup>  |
| Missing                                               | 620              | 549                                    |            |                     | 620              | 71                                          |            |                     |            |                     |
| <b>PgR, %, mean(SD)</b>                               | 58.2 (39.1)      | 58.0 (39.3)                            | 0.442      | 0.032 <sup>d</sup>  | 55.8 (40.0)      | 58.7 (38.1)                                 | 0.123      | 0.086 <sup>d</sup>  | 0.026      | 0.060 <sup>d</sup>  |
| Missing                                               | 654              | 575                                    |            |                     | 654              | 79                                          |            |                     |            |                     |
| <b>HER2 status, No. (%)</b>                           |                  |                                        |            |                     |                  |                                             |            |                     |            |                     |
| Negative                                              | 4,026 (90)       | 3,359 (90)                             | 0.808      | 0.004 <sup>V</sup>  | 1,962 (89)       | 319 (89)                                    | 0.984      | 0.000 <sup>V</sup>  | 0.631      | 0.006 <sup>V</sup>  |
| Positive                                              | 459 (10)         | 385 (10)                               |            |                     | 233 (11)         | 38 (11)                                     |            |                     |            |                     |
| Missing                                               | 140              | 136                                    |            |                     | 16               | 3                                           |            |                     |            |                     |
| <b>Ki67, %, mean(SD)</b>                              | 27.3 (19.3)      | 27.4 (19.6)                            | 0.277      | -0.048 <sup>d</sup> | 28.4 (18.9)      | 27.6 (16.8)                                 | 0.315      | -0.053 <sup>d</sup> | 0.024      | -0.062 <sup>d</sup> |
| Missing                                               | 1,282            | 1,072                                  |            |                     | 1,282            | 210                                         |            |                     |            |                     |
| <b>St Gallen surrogate molecular subtype, No. (%)</b> |                  |                                        |            |                     |                  |                                             |            |                     |            |                     |
| HER2+                                                 | 459 (13)         | 385 (13)                               | 0.026      | 0.029 <sup>V</sup>  | 233 (11)         | 38 (11)                                     | 0.079      | 0.032 <sup>V</sup>  | 0.115      | 0.018 <sup>V</sup>  |
| Luminal A                                             | 2,001 (55)       | 1,679 (55)                             |            |                     | 1,174 (54)       | 185 (53)                                    |            |                     |            |                     |
| Luminal B                                             | 932 (25)         | 757 (25)                               |            |                     | 588 (27)         | 110 (31)                                    |            |                     |            |                     |
| TNBC                                                  | 275 (7)          | 244 (8)                                |            |                     | 177 (8)          | 19 (5)                                      |            |                     |            |                     |
| Missing                                               | 958              | 815                                    |            |                     | 39               | 8                                           |            |                     |            |                     |
| <b>Tumor size, mm, mean(SD)</b>                       | 17.8 (8.2)       | 17.1 (7.7)                             | < 0.001    | 0.573 <sup>d</sup>  | 17.6 (8.1)       | 21.5 (9.0)                                  | < 0.001    | 0.578 <sup>d</sup>  | 0.286      | 0.027 <sup>d</sup>  |
| <b>Multifocality of invasive foci, No. (%)</b>        |                  |                                        |            |                     |                  |                                             |            |                     |            |                     |
| No                                                    | 3,695 (80)       | 3,167 (82)                             | < 0.001    | 0.098 <sup>V</sup>  | 1,751 (79)       | 223 (62)                                    | < 0.001    | 0.189 <sup>V</sup>  | 0.340      | 0.012 <sup>V</sup>  |
| Yes                                                   | 907 (20)         | 695 (18)                               |            |                     | 457 (21)         | 137 (38)                                    |            |                     |            |                     |
| Missing                                               | 23               | 18                                     |            |                     | 3                | 0                                           |            |                     |            |                     |
| <b>LNM status, No. (%)</b>                            |                  |                                        |            |                     |                  |                                             |            |                     |            |                     |
| Negative                                              | 3,488 (75)       | 3,488 (90)                             | < 0.001    | 0.767 <sup>V</sup>  | 1,635 (74)       | 0 (0)                                       | < 0.001    | 0.743 <sup>V</sup>  | 0.190      | 0.016 <sup>V</sup>  |
| Positive                                              | 1,137 (25)       | 392 (10)                               |            |                     | 576 (26)         | 360 (100)                                   |            |                     |            |                     |
| <b>5-year distant recurrence status, No. (%)</b>      |                  |                                        |            |                     |                  |                                             |            |                     |            |                     |
| No relapse                                            | 2,077 (94)       | 1,736 (94)                             | 0.005      | 0.060 <sup>V</sup>  | 1,505 (97)       | 253 (94)                                    | 0.019      | 0.059 <sup>V</sup>  | < 0.001    | 0.068 <sup>V</sup>  |
| Relapse                                               | 140 (6)          | 104 (6)                                |            |                     | 51 (3)           | 15 (6)                                      |            |                     |            |                     |
| Missing                                               | 2,408            | 2,040                                  |            |                     | 655              | 92                                          |            |                     |            |                     |

Comparisons were made between positive vs. negative patients within the development set and the independent test set, respectively. Additionally, the overall differences between the development and the independent test set were compared. *P* values and effect sizes were calculated. The significance level was set at  $P = 0.05$ , and a nontrivial effect size for continuous variables was defined as Cohen's  $|d| \geq 0.50$  [1], and for categorical variables was defined as Cramer's  $|V| \geq 0.30$ ,  $\geq 0.21$  and  $\geq 0.17$  for 1, 2, and 3 degrees of freedom, respectively [2].

**Table S2:** Patient characteristics by St Gallen surrogate subtypes in the development and test cohorts

| Variables                                      | Development set |                      |                    |                |                | Test set       |                      |                    |                |                |
|------------------------------------------------|-----------------|----------------------|--------------------|----------------|----------------|----------------|----------------------|--------------------|----------------|----------------|
|                                                | All<br>n=4,625  | Luminal A<br>n=2,001 | Luminal B<br>n=932 | HER2+<br>n=459 | TNBC<br>n=275  | All<br>n=2,211 | Luminal A<br>n=1,174 | Luminal B<br>n=588 | HER2+<br>n=233 | TNBC<br>n=177  |
| <b>Age, years, mean (SD)</b>                   | 65.0<br>(12.4)  | 65.5<br>(11.6)       | 65.4<br>(13.2)     | 62.7<br>(12.9) | 63.0<br>(13.8) | 65.1<br>(12.6) | 65.8<br>(11.8)       | 64.5<br>(13.3)     | 63.0<br>(13.6) | 66.0<br>(14.0) |
| <b>Menopausal status, No. (%)</b>              |                 |                      |                    |                |                |                |                      |                    |                |                |
| Premenopausal                                  | 895 (21)        | 349 (19)             | 193 (22)           | 110 (26)       | 59 (23)        | 411 (20)       | 200 (18)             | 123 (22)           | 51 (23)        | 27 (16)        |
| Postmenopausal                                 | 3,464 (79)      | 1,526 (81)           | 684 (78)           | 320 (74)       | 196 (77)       | 1,677 (80)     | 909 (82)             | 431 (78)           | 170 (77)       | 138 (84)       |
| Missing                                        | 266             | 126                  | 55                 | 29             | 20             | 123            | 65                   | 34                 | 12             | 12             |
| <b>Mode of detection, No. (%)</b>              |                 |                      |                    |                |                |                |                      |                    |                |                |
| Symptomatic                                    | 2,097 (46)      | 792 (40)             | 479 (52)           | 239 (52)       | 169 (62)       | 1,011 (46)     | 460 (39)             | 304 (52)           | 117 (50)       | 110 (62)       |
| Mammographic                                   | 2,500 (54)      | 1,203 (60)           | 451 (48)           | 218 (48)       | 105 (38)       | 1,196 (54)     | 712 (61)             | 284 (48)           | 115 (50)       | 66 (38)        |
| Missing                                        | 28              | 6                    | 2                  | 2              | 1              | 4              | 2                    | 0                  | 1              | 1              |
| <b>Histological type, No. (%)</b>              |                 |                      |                    |                |                |                |                      |                    |                |                |
| NST                                            | 3,530 (76)      | 1,402 (70)           | 777 (83)           | 410 (89)       | 225 (82)       | 1,701 (77)     | 826 (70)             | 482 (82)           | 215 (92)       | 146 (82)       |
| ILC                                            | 631 (14)        | 364 (18)             | 89 (10)            | 22 (5)         | 6 (2)          | 316 (14)       | 238 (20)             | 62 (11)            | 9 (4)          | 4 (2)          |
| Others                                         | 460 (10)        | 235 (12)             | 66 (7)             | 27 (6)         | 44 (16)        | 193 (9)        | 110 (9)              | 43 (7)             | 9 (4)          | 27 (15)        |
| Missing                                        | 4               | 0                    | 0                  | 0              | 0              | 1              | 0                    | 1                  | 0              | 0              |
| <b>Histological grade, No. (%)</b>             |                 |                      |                    |                |                |                |                      |                    |                |                |
| I                                              | 842 (18)        | 703 (35)             | 0 (0)              | 7 (2)          | 5 (2)          | 389 (18)       | 376 (32)             | 0 (0)              | 6 (3)          | 3 (2)          |
| II                                             | 2,423 (53)      | 1,298 (65)           | 306 (33)           | 148 (32)       | 39 (14)        | 1,145 (52)     | 798 (68)             | 233 (40)           | 77 (33)        | 29 (16)        |
| III                                            | 1,344 (29)      | 0 (0)                | 626 (67)           | 302 (66)       | 231 (84)       | 662 (30)       | 0 (0)                | 355 (60)           | 148 (64)       | 144 (82)       |
| Missing                                        | 16              | 0                    | 0                  | 2              | 0              | 15             | 0                    | 0                  | 2              | 1              |
| <b>ER, %, mean (SD)</b>                        | 85.7<br>(30.2)  | 96.7<br>(7.9)        | 94.0<br>(14.0)     | 65.5<br>(41.6) | 0.4<br>(1.3)   | 85.1<br>(31.8) | 97.3<br>(7.6)        | 95.2<br>(11.3)     | 63.6<br>(42.4) | 0.3<br>(1.1)   |
| Missing                                        | 620             | 0                    | 0                  | 74             | 0              | 9              | 0                    | 0                  | 1              | 0              |
| <b>PgR, %, mean (SD)</b>                       | 58.2<br>(39.1)  | 69.1<br>(34.6)       | 59.1<br>(36.5)     | 33.0<br>(37.3) | 0.2<br>(0.9)   | 55.8<br>(40.0) | 67.9<br>(35.1)       | 58.7<br>(37.7)     | 29.6<br>(36.0) | 0.1<br>(0.9)   |
| Missing                                        | 654             | 0                    | 0                  | 86             | 0              | 14             | 0                    | 0                  | 1              | 0              |
| <b>HER2 status, No. (%)</b>                    |                 |                      |                    |                |                |                |                      |                    |                |                |
| Negative                                       | 4,026 (90)      | 2,001 (100)          | 932 (100)          | 0 (0)          | 275 (100)      | 1,962 (89)     | 1,174 (100)          | 588 (100)          | 0 (0)          | 177 (100)      |
| Positive                                       | 459 (10)        | 0 (0)                | 0 (0)              | 459 (100)      | 0 (0)          | 233 (11)       | 0 (0)                | 0 (0)              | 233 (100)      | 0 (0)          |
| Missing                                        | 140             | 0                    | 0                  | 0              | 0              | 16             | 0                    | 0                  | 0              | 0              |
| <b>Ki67, %, mean (SD)</b>                      | 27.3<br>(19.3)  | 15.8<br>(7.1)        | 38.5<br>(13.5)     | 39.2<br>(18.7) | 60.3<br>(25.4) | 28.4<br>(18.9) | 16.3<br>(7.5)        | 39.0<br>(13.6)     | 40.1<br>(17.0) | 56.5<br>(24.9) |
| Missing                                        | 1,282           | 121                  | 118                | 147            | 37             | 4              | 0                    | 0                  | 1              | 0              |
| <b>Tumor size, mm, mean (SD)</b>               | 17.8<br>(8.2)   | 16.5<br>(7.9)        | 20.5<br>(8.6)      | 18.4<br>(7.9)  | 19.0<br>(7.7)  | 17.6<br>(8.1)  | 16.7<br>(8.1)        | 19.4<br>(7.8)      | 17.7<br>(8.2)  | 18.6<br>(8.2)  |
| <b>Multifocality of invasive foci, No. (%)</b> |                 |                      |                    |                |                |                |                      |                    |                |                |
| No                                             | 3,695 (80)      | 1,567 (78)           | 742 (80)           | 358 (78)       | 245 (89)       | 1,751 (79)     | 945 (81)             | 437 (74)           | 190 (82)       | 151 (85)       |
| Yes                                            | 907 (20)        | 433 (22)             | 189 (20)           | 99 (22)        | 30 (11)        | 457 (21)       | 227 (19)             | 150 (26)           | 43 (18)        | 26 (15)        |
| Missing                                        | 23              | 1                    | 1                  | 2              | 0              | 3              | 2                    | 1                  | 0              | 0              |
| <b>LNM status, No. (%)</b>                     |                 |                      |                    |                |                |                |                      |                    |                |                |
| Negative                                       | 3,488 (75)      | 1,527 (76)           | 653 (70)           | 345 (75)       | 231 (84)       | 1,635 (74)     | 884 (75)             | 408 (69)           | 170 (73)       | 146 (82)       |
| Positive                                       | 1,137 (25)      | 474 (24)             | 279 (30)           | 114 (25)       | 44 (16)        | 576 (26)       | 290 (25)             | 180 (31)           | 63 (27)        | 31 (18)        |
| <b>SLNM status, No. (%)</b>                    |                 |                      |                    |                |                |                |                      |                    |                |                |
| Negative                                       | 3,880 (84)      | 1,679 (84)           | 757 (81)           | 385 (84)       | 244 (89)       | 1,851 (84)     | 989 (84)             | 478 (81)           | 195 (84)       | 158 (89)       |
| Positive                                       | 745 (16)        | 322 (16)             | 175 (19)           | 74 (16)        | 31 (11)        | 360 (16)       | 185 (16)             | 110 (19)           | 38 (16)        | 19 (11)        |
| <b>Adjuvant therapy, No. (%)</b>               |                 |                      |                    |                |                |                |                      |                    |                |                |
| Endocrine therapy alone                        | 2,477 (60)      | 1,467 (84)           | 348 (38)           | 47 (11)        | 2 (1)          | 1,105 (57)     | 866 (88)             | 202 (35)           | 19 (9)         | 1 (1)          |
| Chemotherapy alone                             | 297 (7)         | 2 (0)                | 10 (1)             | 3 (1)          | 206 (98)       | 150 (8)        | 0 (0)                | 8 (1)              | 4 (2)          | 127 (98)       |
| Endocrine+chemotherapy                         | 969 (23)        | 268 (15)             | 544 (60)           | 6 (1)          | 3 (1)          | 501 (26)       | 121 (12)             | 366 (63)           | 6 (3)          | 2 (2)          |
| HER2-directed therapy                          | 395 (10)        | 2 (0)                | 4 (0)              | 387 (87)       | 0 (0)          | 195 (10)       | 0 (0)                | 1 (0)              | 194 (87)       | 0 (0)          |
| Missing                                        | 487             | 262                  | 26                 | 16             | 64             | 260            | 187                  | 11                 | 10             | 47             |
| <b>Breast surgery, No. (%)</b>                 |                 |                      |                    |                |                |                |                      |                    |                |                |
| Breast conserving surgery                      | 3,149 (68)      | 1,478 (74)           | 611 (66)           | 281 (61)       | 184 (67)       | 1,570 (71)     | 881 (75)             | 400 (68)           | 155 (67)       | 109 (62)       |
| Mastectomy                                     | 1,476 (32)      | 523 (26)             | 321 (34)           | 178 (39)       | 91 (33)        | 641 (29)       | 293 (25)             | 188 (32)           | 78 (33)        | 68 (38)        |
| <b>5-year DR status, No. (%)</b>               |                 |                      |                    |                |                |                |                      |                    |                |                |
| No relapse                                     | 2,077 (94)      | 747 (98)             | 344 (87)           | 219 (91)       | 93 (82)        | 1,505 (97)     | 807 (98)             | 410 (96)           | 148 (95)       | 108 (91)       |
| Relapse                                        | 140 (6)         | 17 (2)               | 53 (13)            | 22 (9)         | 20 (18)        | 51 (3)         | 16 (2)               | 16 (4)             | 8 (5)          | 11 (9)         |
| Missing                                        | 2,408           | 1,237                | 535                | 218            | 162            | 655            | 351                  | 162                | 77             | 58             |
| <b>DRFi if no event, years, mean (SD)</b>      | 6.8<br>(2.5)    | 5.9<br>(2.2)         | 6.2<br>(2.4)       | 6.9<br>(2.6)   | 6.5<br>(2.6)   | 4.9<br>(1.1)   | 4.9<br>(1.0)         | 4.9<br>(1.1)       | 4.9<br>(1.3)   | 4.8<br>(1.4)   |

St Gallen surrogate subtypes were defined according to [3]. Luminal A, luminal A-like; Luminal B, luminal B-like; HER2+, HER2-enriched; TNBC, triple negative breast cancer; NST, no special type; ILC, invasive lobular carcinoma; LNM, lymph node metastasis; SLNM, sentinel lymph node macro-metastasis; BCS, Breast conserving surgery; DRFi, distant recurrence-free interval.

**Table S3:** Clinical characteristics of patient groups stratified by clinical molecular subtypes and ASCO guidelines in the recalibration and hold-out splits of the independent test set

| Variables                                             | Recalibration set |                                  |                                  |                |                | Hold-out test set |                                  |                                  |                |                |
|-------------------------------------------------------|-------------------|----------------------------------|----------------------------------|----------------|----------------|-------------------|----------------------------------|----------------------------------|----------------|----------------|
|                                                       | All<br>n=761      | ER+HER2-<br>(ASCO-omit)<br>n=196 | ER+HER2-<br>(ASCO-SLNB)<br>n=420 | HER2+<br>n=84  | TNBC<br>n=45   | All<br>n=1,450    | ER+HER2-<br>(ASCO-omit)<br>n=355 | ER+HER2-<br>(ASCO-SLNB)<br>n=802 | HER2+<br>n=149 | TNBC<br>n=132  |
| <b>Age, years, mean (SD)</b>                          | 63.9<br>(13.0)    | 69.1<br>(8.4)                    | 62.3<br>(13.9)                   | 61.0<br>(13.9) | 63.1<br>(13.7) | 65.7<br>(12.4)    | 69.2<br>(8.2)                    | 64.3<br>(13.1)                   | 64.1<br>(13.3) | 67.0<br>(14.0) |
| <b>Menopausal status, No. (%)</b>                     |                   |                                  |                                  |                |                |                   |                                  |                                  |                |                |
| Postmenopausal                                        | 552 (77)          | 196 (100)                        | 253 (67)                         | 60 (73)        | 33 (75)        | 1,125 (82)        | 355 (100)                        | 546 (73)                         | 110 (79)       | 105 (87)       |
| Premenopausal                                         | 163 (23)          | 0 (0)                            | 124 (33)                         | 22 (27)        | 11 (25)        | 248 (18)          | 0 (0)                            | 200 (27)                         | 29 (21)        | 16 (13)        |
| Missing                                               | 46                | 0                                | 43                               | 2              | 1              | 77                | 0                                | 56                               | 10             | 11             |
| <b>Mode of detection, No. (%)</b>                     |                   |                                  |                                  |                |                |                   |                                  |                                  |                |                |
| Symptomatic                                           | 333 (44)          | 60 (31)                          | 194 (46)                         | 45 (54)        | 25 (57)        | 678 (47)          | 113 (32)                         | 400 (50)                         | 72 (48)        | 85 (64)        |
| Mammographic                                          | 426 (56)          | 136 (69)                         | 226 (54)                         | 38 (46)        | 19 (43)        | 770 (53)          | 241 (68)                         | 401 (50)                         | 77 (52)        | 47 (36)        |
| Missing                                               | 2                 | 0                                | 0                                | 1              | 1              | 2                 | 1                                | 1                                | 0              | 0              |
| <b>Histological type, No. (%)</b>                     |                   |                                  |                                  |                |                |                   |                                  |                                  |                |                |
| NST                                                   | 597 (79)          | 196 (100)                        | 270 (64)                         | 78 (93)        | 40 (89)        | 1,104 (76)        | 355 (100)                        | 496 (62)                         | 137 (92)       | 106 (80)       |
| ILC                                                   | 103 (14)          | 0 (0)                            | 96 (23)                          | 5 (6)          | 0 (0)          | 213 (15)          | 0 (0)                            | 205 (26)                         | 4 (3)          | 4 (3)          |
| Others                                                | 60 (8)            | 0 (0)                            | 53 (13)                          | 1 (1)          | 5 (11)         | 133 (9)           | 0 (0)                            | 101 (13)                         | 8 (5)          | 22 (17)        |
| Missing                                               | 1                 | 0                                | 1                                | 0              | 0              | 0                 | 0                                | 0                                | 0              | 0              |
| <b>Histological grade, No. (%)</b>                    |                   |                                  |                                  |                |                |                   |                                  |                                  |                |                |
| I                                                     | 134 (18)          | 60 (31)                          | 67 (16)                          | 2 (2)          | 2 (4)          | 255 (18)          | 124 (35)                         | 125 (16)                         | 4 (3)          | 1 (1)          |
| II                                                    | 414 (55)          | 136 (69)                         | 237 (57)                         | 27 (32)        | 8 (18)         | 731 (51)          | 231 (65)                         | 427 (54)                         | 50 (34)        | 21 (16)        |
| III                                                   | 208 (28)          | 0 (0)                            | 112 (27)                         | 55 (65)        | 35 (78)        | 454 (32)          | 0 (0)                            | 243 (31)                         | 93 (63)        | 109 (83)       |
| Missing                                               | 5                 | 0                                | 4                                | 0              | 0              | 10                | 0                                | 7                                | 2              | 1              |
| <b>ER, %, mean (SD)</b>                               | 86.7<br>(29.4)    | 97.8<br>(7.5)                    | 95.7<br>(9.5)                    | 63.1<br>(42.2) | 0.2<br>(0.9)   | 84.3<br>(32.9)    | 98.3<br>(5.2)                    | 96.0<br>(10.2)                   | 63.9<br>(42.6) | 0.3<br>(1.2)   |
| Missing                                               | 5                 | 0                                | 0                                | 0              | 0              | 4                 | 0                                | 0                                | 1              | 0              |
| <b>PgR, %, mean (SD)</b>                              | 58.4<br>(39.4)    | 64.4<br>(36.3)                   | 67.3<br>(35.3)                   | 32.0<br>(37.7) | 0.0<br>(0.1)   | 54.5<br>(40.2)    | 65.5<br>(34.9)                   | 63.6<br>(37.3)                   | 28.3<br>(35.1) | 0.2<br>(1.0)   |
| Missing                                               | 9                 | 0                                | 0                                | 0              | 0              | 5                 | 0                                | 0                                | 1              | 0              |
| <b>HER2 status, No. (%)</b>                           |                   |                                  |                                  |                |                |                   |                                  |                                  |                |                |
| Negative                                              | 669 (89)          | 196 (100)                        | 420 (100)                        | 0 (0)          | 45 (100)       | 1,293 (90)        | 355 (100)                        | 802 (100)                        | 0 (0)          | 132 (100)      |
| Positive                                              | 84 (11)           | 0 (0)                            | 0 (0)                            | 84 (100)       | 0 (0)          | 149 (10)          | 0 (0)                            | 0 (0)                            | 149 (100)      | 0 (0)          |
| Missing                                               | 8                 | 0                                | 0                                | 0              | 0              | 8                 | 0                                | 0                                | 0              | 0              |
| <b>Ki67, %, mean (SD)</b>                             | 28.7<br>(19.1)    | 19.9<br>(11.2)                   | 26.6<br>(16.7)                   | 42.0<br>(17.1) | 60.1<br>(23.8) | 28.3<br>(18.7)    | 19.0<br>(10.1)                   | 25.7<br>(15.3)                   | 39.0<br>(16.8) | 55.2<br>(25.2) |
| Missing                                               | 1                 | 0                                | 0                                | 0              | 0              | 3                 | 0                                | 0                                | 1              | 0              |
| <b>St Gallen surrogate molecular subtype, No. (%)</b> |                   |                                  |                                  |                |                |                   |                                  |                                  |                |                |
| Luminal A                                             | 413 (56)          | 168 (86)                         | 245 (59)                         | 0 (0)          | 0 (0)          | 761 (53)          | 308 (87)                         | 453 (57)                         | 0 (0)          | 0 (0)          |
| Luminal B                                             | 199 (27)          | 28 (14)                          | 171 (41)                         | 0 (0)          | 0 (0)          | 389 (27)          | 47 (13)                          | 342 (43)                         | 0 (0)          | 0 (0)          |
| HER2+                                                 | 84 (11)           | 0 (0)                            | 0 (0)                            | 84 (100)       | 0 (0)          | 149 (10)          | 0 (0)                            | 0 (0)                            | 149 (100)      | 0 (0)          |
| TNBC                                                  | 45 (6)            | 0 (0)                            | 0 (0)                            | 0 (0)          | 45 (100)       | 132 (9)           | 0 (0)                            | 0 (0)                            | 0 (0)          | 132 (100)      |
| Missing                                               | 20                | 0                                | 4                                | 0              | 0              | 19                | 0                                | 7                                | 0              | 0              |
| <b>Tumor size, mm, mean (SD)</b>                      | 17.1<br>(8.1)     | 13.0<br>(3.4)                    | 18.6<br>(8.7)                    | 17.7<br>(8.8)  | 21.2<br>(9.1)  | 17.9<br>(8.1)     | 13.1<br>(3.7)                    | 20.1<br>(8.7)                    | 17.7<br>(7.8)  | 17.8<br>(7.8)  |
| <b>Multifocality of invasive foci, No. (%)</b>        |                   |                                  |                                  |                |                |                   |                                  |                                  |                |                |
| No                                                    | 605 (80)          | 196 (100)                        | 285 (68)                         | 72 (86)        | 42 (93)        | 1,146 (79)        | 355 (100)                        | 554 (69)                         | 118 (79)       | 109 (83)       |
| Yes                                                   | 155 (20)          | 0 (0)                            | 134 (32)                         | 12 (14)        | 3 (7)          | 302 (21)          | 0 (0)                            | 246 (31)                         | 31 (21)        | 23 (17)        |
| Missing                                               | 1                 | 0                                | 1                                | 0              | 0              | 2                 | 0                                | 2                                | 0              | 0              |
| <b>LNM status, No. (%)</b>                            |                   |                                  |                                  |                |                |                   |                                  |                                  |                |                |
| Negative                                              | 569 (75)          | 161 (82)                         | 296 (70)                         | 61 (73)        | 37 (82)        | 1,066 (74)        | 286 (81)                         | 555 (69)                         | 109 (73)       | 109 (83)       |
| Positive                                              | 192 (25)          | 35 (18)                          | 124 (30)                         | 23 (27)        | 8 (18)         | 384 (26)          | 69 (19)                          | 247 (31)                         | 40 (27)        | 23 (17)        |
| <b>SLNM status, No. (%)</b>                           |                   |                                  |                                  |                |                |                   |                                  |                                  |                |                |
| Negative                                              | 642 (84)          | 180 (92)                         | 337 (80)                         | 71 (85)        | 40 (89)        | 1,209 (83)        | 315 (89)                         | 641 (80)                         | 124 (83)       | 118 (89)       |
| Positive                                              | 119 (16)          | 16 (8)                           | 83 (20)                          | 13 (15)        | 5 (11)         | 241 (17)          | 40 (11)                          | 161 (20)                         | 25 (17)        | 14 (11)        |
| <b>Adjuvant therapy, No. (%)</b>                      |                   |                                  |                                  |                |                |                   |                                  |                                  |                |                |
| Endocrine therapy alone                               | 383 (57)          | 139 (87)                         | 232 (60)                         | 5 (6)          | 0 (0)          | 722 (56)          | 250 (89)                         | 454 (60)                         | 14 (10)        | 1 (1)          |
| Chemotherapy alone                                    | 44 (7)            | 0 (0)                            | 2 (1)                            | 2 (3)          | 34 (100)       | 106 (8)           | 1 (0)                            | 5 (1)                            | 2 (1)          | 93 (97)        |
| Endocrine therapy + chemotherapy                      | 175 (26)          | 20 (13)                          | 150 (39)                         | 4 (5)          | 0 (0)          | 326 (25)          | 29 (10)                          | 291 (39)                         | 2 (1)          | 2 (2)          |
| HER2-directed therapy                                 | 67 (10)           | 0 (0)                            | 0 (0)                            | 67 (86)        | 0 (0)          | 128 (10)          | 0 (0)                            | 1 (0)                            | 127 (88)       | 0 (0)          |
| Missing                                               | 92                | 37                               | 36                               | 6              | 11             | 168               | 75                               | 51                               | 4              | 36             |
| <b>Breast surgery, No. (%)</b>                        |                   |                                  |                                  |                |                |                   |                                  |                                  |                |                |
| Breast conserving surgery                             | 532 (70)          | 161 (82)                         | 280 (67)                         | 55 (65)        | 27 (60)        | 1,038 (72)        | 314 (88)                         | 535 (67)                         | 100 (67)       | 82 (62)        |
| Mastectomy                                            | 229 (30)          | 35 (18)                          | 140 (33)                         | 29 (35)        | 18 (40)        | 412 (28)          | 41 (12)                          | 267 (33)                         | 49 (33)        | 50 (38)        |
| <b>5-year DR status, No. (%)</b>                      |                   |                                  |                                  |                |                |                   |                                  |                                  |                |                |
| No relapse                                            | 583 (97)          | 146 (99)                         | 332 (98)                         | 62 (95)        | 30 (83)        | 922 (97)          | 224 (100)                        | 523 (96)                         | 86 (95)        | 78 (94)        |
| Relapse                                               | 18 (3)            | 1 (1)                            | 8 (2)                            | 3 (5)          | 6 (17)         | 33 (3)            | 1 (0)                            | 22 (4)                           | 5 (5)          | 5 (6)          |
| Missing                                               | 160               | 49                               | 80                               | 19             | 9              | 495               | 130                              | 257                              | 58             | 49             |
| <b>DRFi if no event, years, mean (SD)</b>             | 5.1<br>(1.0)      | 4.9<br>(1.0)                     | 5.1<br>(0.9)                     | 5.2<br>(1.1)   | 5.1<br>(1.0)   | 4.8<br>(1.2)      | 4.8<br>(1.1)                     | 4.9<br>(1.1)                     | 4.7<br>(1.3)   | 4.6<br>(1.5)   |

Clinical tumor subtypes of ER+HER2-, HER2+ and TNBC were labeled according to [3]. ASCO-omit (patients recommended to omit SLNB) and ASCO-SLNB (patients recommended to undergo SLNB) were distinguished according to the 2025 ASCO guidelines. SLNM was defined as the presence of macrometastasis ( $\geq 2$  mm) on SLNB. LNM was defined as the presence of  $\geq 0.2$  mm metastasis, including both micro- and macrometastases on SLNB and/or ALND. Luminal A, luminal A-like; Luminal B, luminal B-like; HER2+, HER2-enriched; TNBC, triple negative breast cancer; NST, no special type; ILC, invasive lobular carcinoma; LNM, lymph node metastasis; SLNM, sentinel lymph node macro-metastasis; DRFi, distant recurrence-free interval.

## 1 6 Supplementary

### 2 6.1 Published cancer pathways selected for study

**Table S4:** Ten canonical cancer pathways curated by [4]

| Pathway name | Description                                                    |
|--------------|----------------------------------------------------------------|
| Cell Cycle   | Regulation of mitotic cell cycle progression                   |
| HIPPO        | Regulation of cell proliferation and differentiation           |
| MYC          | Regulation of cell growth, proliferation and apoptosis         |
| NOTCH        | Regulation of cell growth and apoptosis                        |
| NRF2         | Regulation of oxidative stress response                        |
| PI3K         | Regulation of cell growth                                      |
| RTK/RAS      | Regulation of cell proliferation and survival                  |
| TGF $\beta$  | Regulation of cell proliferation and stem/progenitor phenotype |
| TP53         | Regulation of cell proliferation, survival and apoptosis       |
| WNT          | Regulation of cell proliferation                               |

Two curated gene lists of MutSig (Mutation Significance) and OncoKB (Oncology Knowledge Base) were included as background or benchmark genes.

Detailed lists of gene IDs is available at <https://ars.els-cdn.com/content/image/1-s2.0-S0092867418303593-mm2.xlsx>

**Table S5:** Thirty established breast cancer pathways [5]

| Reactome ID   | Description                                      |
|---------------|--------------------------------------------------|
| R-HSA-1640170 | Cell Cycle                                       |
| R-HSA-6802957 | Oncogenic MAPK signaling                         |
| R-HSA-75893   | TNF signaling                                    |
| R-HSA-389948  | PD-1 signaling                                   |
| R-HSA-6806834 | Signaling by MET                                 |
| R-HSA-8853659 | RET signaling                                    |
| R-HSA-167044  | Signalling to RAS                                |
| R-HSA-165159  | mTOR signalling                                  |
| R-HSA-4791275 | Signaling by WNT in cancer                       |
| R-HSA-5358351 | Signaling by Hedgehog                            |
| R-HSA-2219528 | PI3K/AKT Signaling in Cancer                     |
| R-HSA-5674404 | PTEN Loss of Function in Cancer                  |
| R-HSA-2644603 | Signaling by NOTCH1 in Cancer                    |
| R-HSA-1980145 | Signaling by NOTCH2                              |
| R-HSA-9012852 | Signaling by NOTCH3                              |
| R-HSA-9013694 | Signaling by NOTCH4                              |
| R-HSA-69610   | p53-Independent DNA Damage Response              |
| R-HSA-1234174 | Cellular response to hypoxia                     |
| R-HSA-73893   | DNA Damage Bypass                                |
| R-HSA-73942   | DNA Damage Reversal                              |
| R-HSA-5685942 | HDR through Homologous Recombination (HRR)       |
| R-HSA-6796648 | TP53 Regulates Transcription of DNA Repair Genes |
| R-HSA-1643713 | Signaling by EGFR in Cancer                      |
| R-HSA-9018519 | Estrogen-dependent gene expression               |
| R-HSA-5358508 | Mismatch Repair                                  |
| R-HSA-109581  | Apoptosis                                        |
| R-HSA-170834  | Signaling by TGF-beta Receptor Complex           |
| R-HSA-354192  | Integrin signaling                               |
| R-HSA-1227986 | Signaling by ERBB2                               |
| R-HSA-1236394 | Signaling by ERBB4                               |

Reactome pathways gene set is available at <https://download.reactome.org/95/ReactomePathways.gmt.zip>

## 6.2 A composite score for model selection

A composite score combining the ROC AUC and PR AUC was used for model selection, formulated as  $Score = (\frac{ROC\ AUC}{0.5} + \frac{PR\ AUC}{positive\ fraction})/2$ . The baseline for ROC AUC is always 0.5 (random guessing), regardless of class distribution. The baseline for PR AUC corresponds to the positive class ratio, which changes based on dataset imbalance. Thus, the score is an average of the normalized ROC AUC and PR AUC relative to their respective baselines.

## 6.3 RNA-sequencing derived mutation features added no predictive benefit for SLNM compared to GEX data alone

Variant calling was performed using the pipeline described in [5], with variant filters to reduce false-positive calls resulting from either sequencing or PCR artifacts, RNA editing, or germline variants. Gene-level mutation impact index (**GeneMutImpact**) ranging from 0 to 3 was extracted using functional annotations of each gene based on Vcfanno [6]: 0 for no mutation detected, 1 for low impact, 2 for moderate impact and 3 for high impact. For patient-level mutation burden (**MutBurden**), a single value for the total burden was calculated by summing the individual mutation counts. (**GeneMutImpact**) was integrated into GEX modeling by cross-attention layers. The predictive performance of the gene-level mutation index and patient-level mutation burden was presented in Supplementary Figure S1.

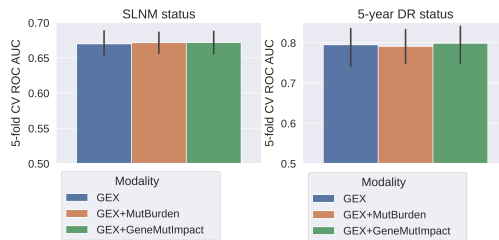

**Fig. S1:** 5-fold cross-validation for nodal metastasis prediction and recurrence prediction using GEX and mutation data. RNA-seq-derived mutation features did not improve SLNM prediction nor 5-year DR status prediction in the development. GEX, gene expression; MutBurden, total mutation burden at patient-level; GeneMutImpact, mutation impact index at gene-level; SLNM, sentinel lymph node macro-metastasis; DR, distant recurrence.

## 6.4 Pretraining on publicly available bulk RNA-seq data showed limited improvement for SLNM prediction in SCAN-B cohort

GEO expression data of 340k samples in raw counts were downloaded from ARSH4 [7]. 256k samples with > 75% non-zero gene counts across the 18,536 common genes shared with the SCAN-B dataset were extracted. The gene expression data were then transformed to FPKM format and were preprocessed using the same procedures as the SCAN-B data regarding log transformation and sample-wise normalization. Next, the Transformer model was trained on the curated GEO data to predict expression values of the masked genes (as shown in Supplementary Figure S2a) for 100 epochs with a learning rate of 0.0001. Supervised finetuning was then performed in the SCAN-B cohort to predict SLNM and 5-year DR status. Results showed that transfer learning on public

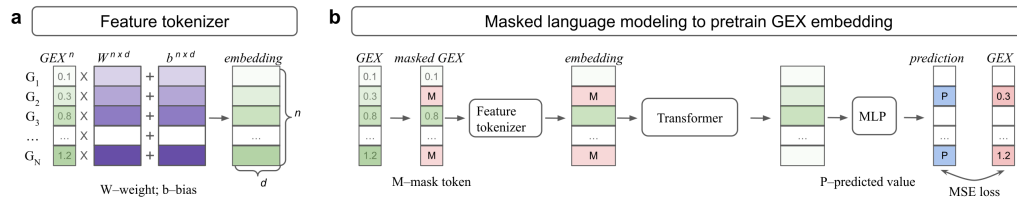

(a) GEX embedding. **a)** The feature tokenizer, converting raw GEX values to meaningful embeddings, is essential for Transformer modeling. **b)** Mask language modeling by practicing a "fill-in-the-blanks" task is a self-supervised learning technique to pretrain the feature tokenizer as well as other Transformer modules. GEX, gene expression; MSE, mean squared error.

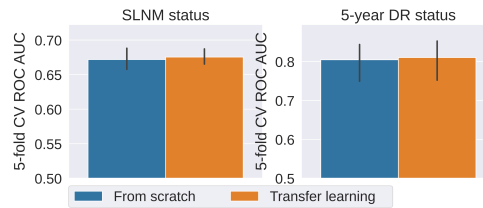

(b) Predictive performance for SLNM and 5-year DR status of GEX models pretrained on open-source data versus trained from scratch.

**Fig. S2:** Pretraining protocols and validation on SCAN-B data

33 transcriptomic data provided only a negligible benefit compared to training from scratch  
 34 (Supplementary Figure S2b).

35 **6.5 Supplementary results**

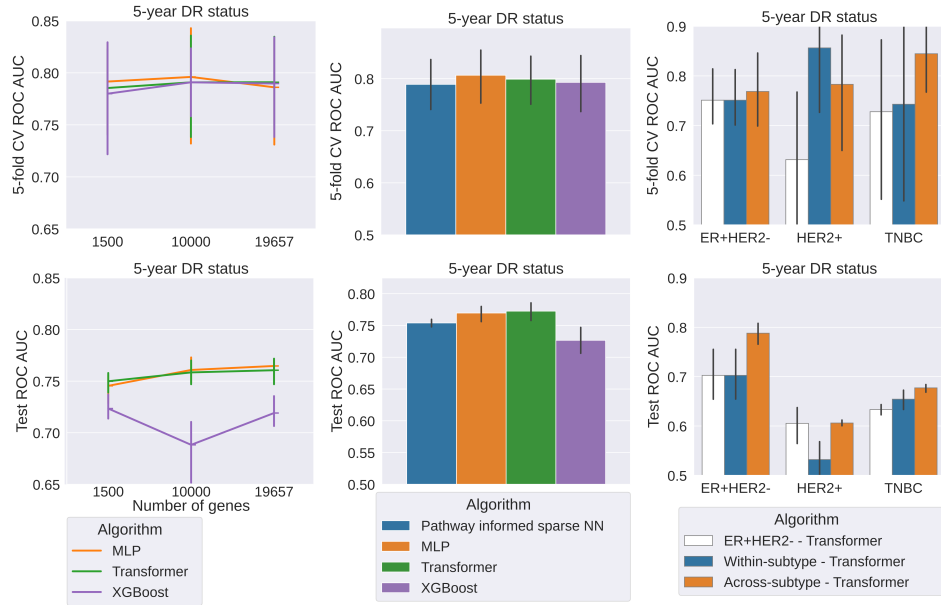

**Fig. S3:** 5-fold cross-validation (CV) and test performance for GEX-based distance recurrence prediction (DR). MLP and Transformer models demonstrated a higher capacity for handling a large number of gene inputs than XGBoost (the left column). MLP and Transformer exhibited enhanced ability for modeling complex correlations within GEX data (the middle column) in comparison to XGBoost and the sparse neural network (NN) incorporating pathway information. Across-subtype training improved learning for DR prediction, especially for the dominant, low-risk ER+HER2- group, by transferring knowledge from relapsed events in the high-risk groups (the right column). Compared to the test performance, the 5-fold CV showed larger error bars and a tendency towards overfitting due to the limited number of relapse events in each internal validation fold (an average of 28 cases). The error bars were calculated as the standard deviations across the 5-fold CV models.

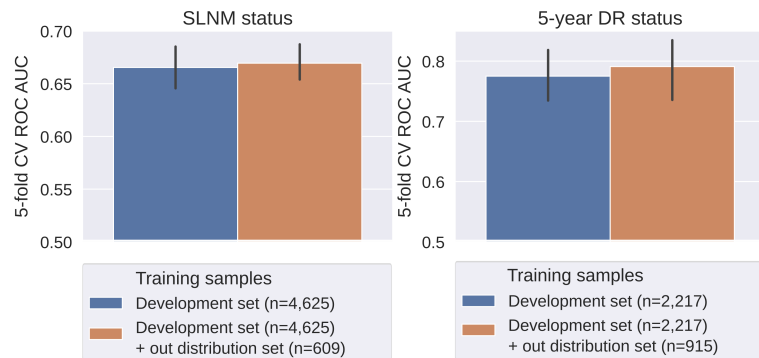

**Fig. S4:** Additional GEX data of out distribution patients slightly improved model performance for predicting SLNM and 5-year DR status in the development cohort. The out distribution set consisted of more advanced breast cancer patients with clinically positive nodes or with a tumor size >50 mm, who were previously excluded from the study cohort. The additional out-of-distribution data was only integrated into training and was not used for cross-validation (CV).

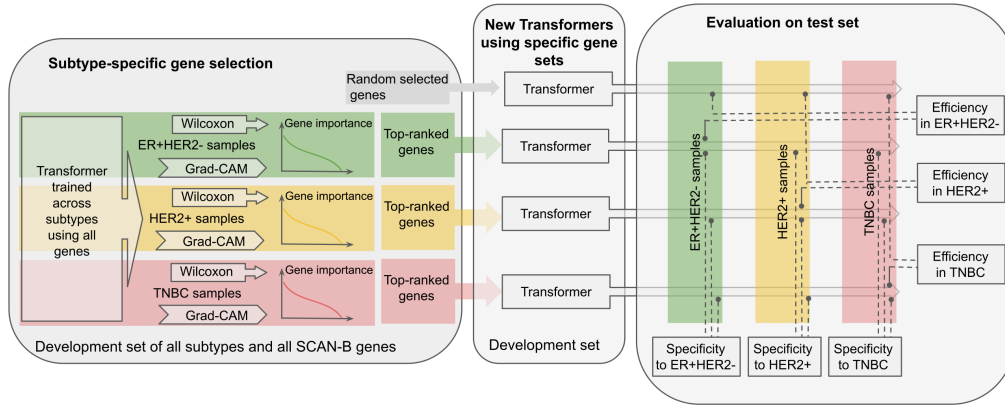

(a) First, all SCAN-B genes were sorted by gene importance, their association with sentinel lymph node macrometastasis quantified by either Wilcoxon test or Grad-CAM, within each subgroup. Specifically, Grad-CAM values were derived from 10 Transformer models repetitively trained on the entire development set using all SCAN-B genes. Next, varying numbers of top-ranked genes were selected in the development set based on different strategies (Wilcoxon test, Grad-CAM, or random sampling). New Transformer models were then trained separately using these gene sets on the development set. Finally, the Transformers were evaluated in the independent test set. Efficiency was assessed by comparing the predictive performance between Transformer models trained using strategically selected gene sets and those using randomly selected gene sets within each subtype. Specificity was assessed by comparing the predictive performance of Transformers trained using different gene sets within and outside subtypes. For example, the gene specificity to the TNBC subtype was measured by comparing the models trained using ER+HER2-, HER2+ specific gene sets (outside the target subtype) with those using the TNBC specific gene set (within the target subtype).

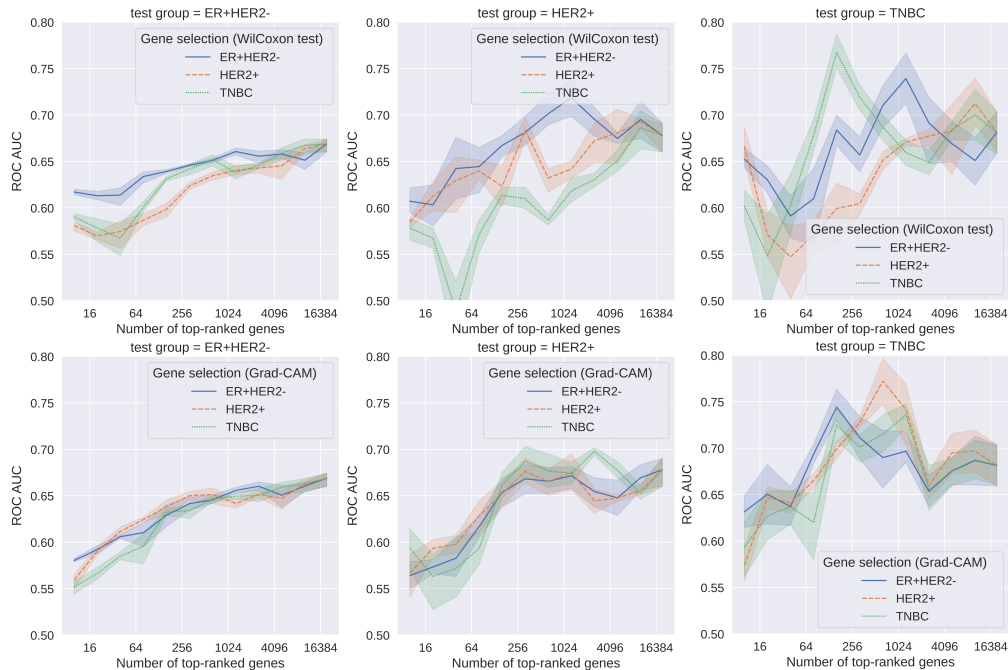

(b) High specificity was demonstrated when internal validation showed superior performance compared to the cross-validation. Overall, the Wilcoxon test-based gene selection exhibited higher specificity than the Grad-CAM-based approach. The top row shows results for selections based on the Wilcoxon rank-sum test, and the bottom row for Grad-CAM-based selection. Columns correspond to validation in each group: ER+HER2- (left), HER2+ (middle) and TNBC (right).

**Fig. S5:** a) The workflow of gene selection and evaluation of the specificity and efficiency of the selected gene sets. b) Cross-validation within and outside subtypes to assess the specificity of gene selections.

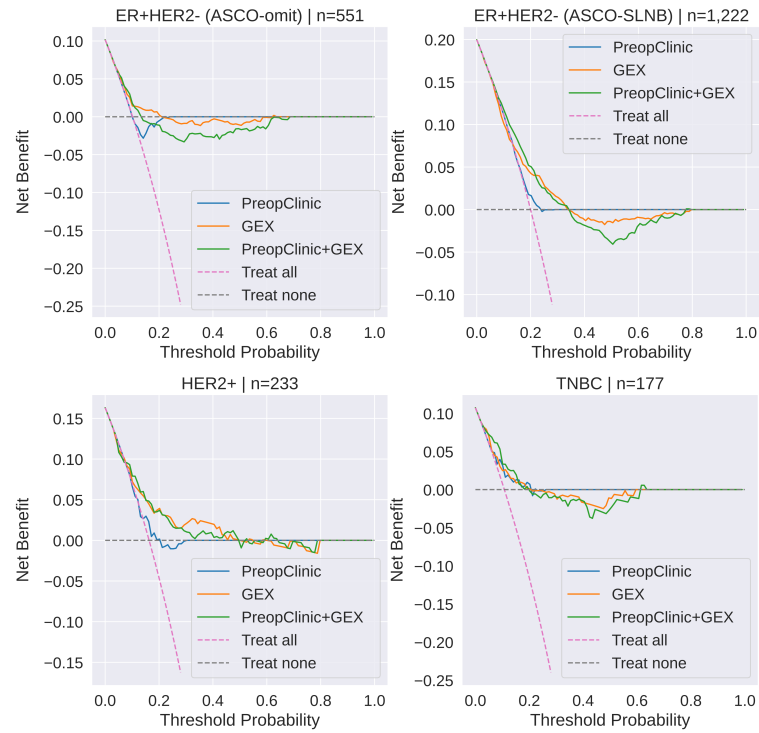

**Fig. S6:** Decision curves illustrating net benefit for predicting sentinel lymph node macro-metastasis by tumor subtypes in the independent test set using the developed models: PreopClinic, GEX and PreopClinic+GEX. Net benefit is a trade-off between the benefit of true positive predictions and the harm of the false positive predictions. A lower threshold probability implies a greater concern about the metastasis in axilla, while a higher threshold probability implies a greater concern about the action to be taken, such as axilla surgery. PreopClinic, preoperative clinicopathology; GEX, gene expression.

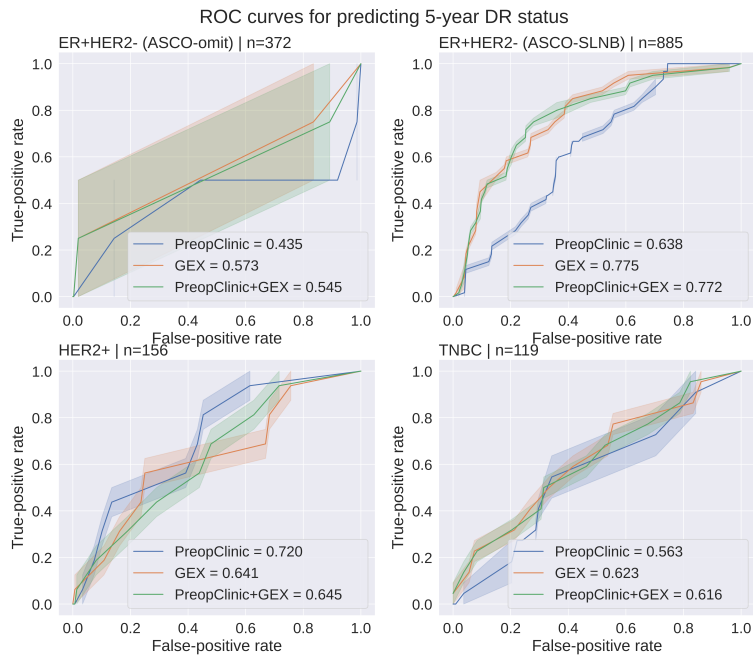

**Fig. S7:** Comparison of ROC curves for predicting 5-year DR in the independent test set by molecular subtypes. PreopClinic, preoperative clinicopathology; GEX, gene expression. SLNM, sentinel lymph node macro-metastasis; DR, distant recurrence.

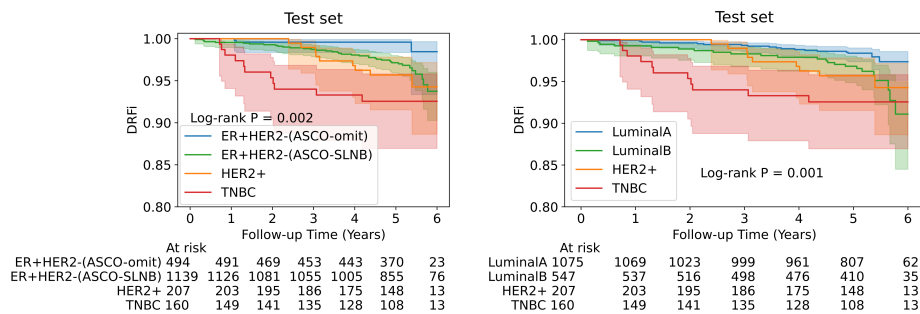

**Fig. S8:** Kaplan-Meier plots stratified by clinical subtypes with the endpoint of DRFi in the independent test set. Left: combination of clinical subtypes and ASCO guidelines; Right: St Gallen surrogate subtypes

(a) ER+HER2- patients divided by Luminal A- or B-like and corresponding therapy.

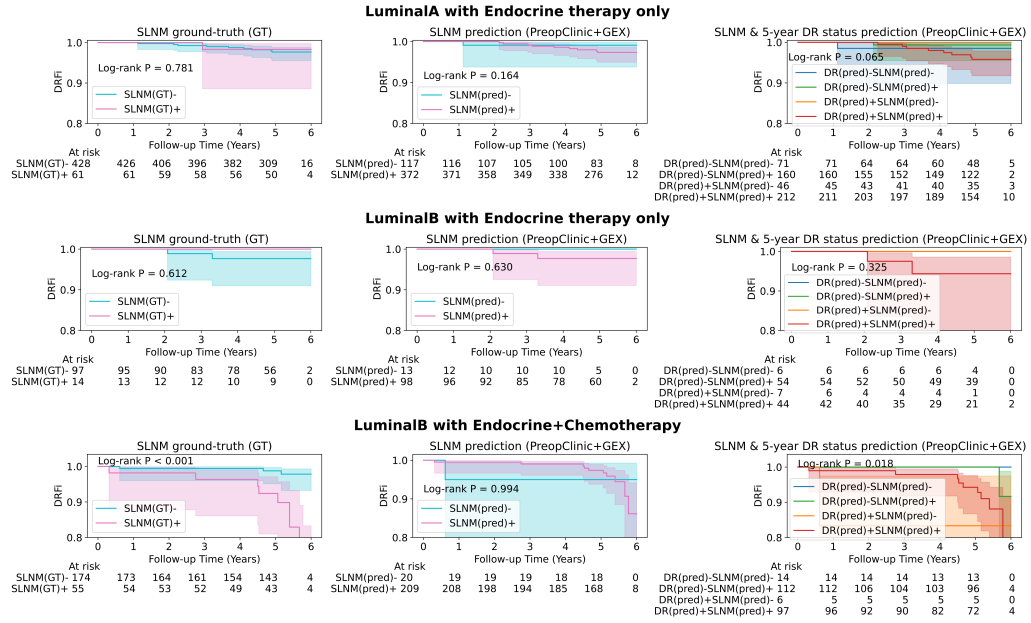

(b) ER+HER2- patients divided by ASCO recommendation and corresponding therapy.

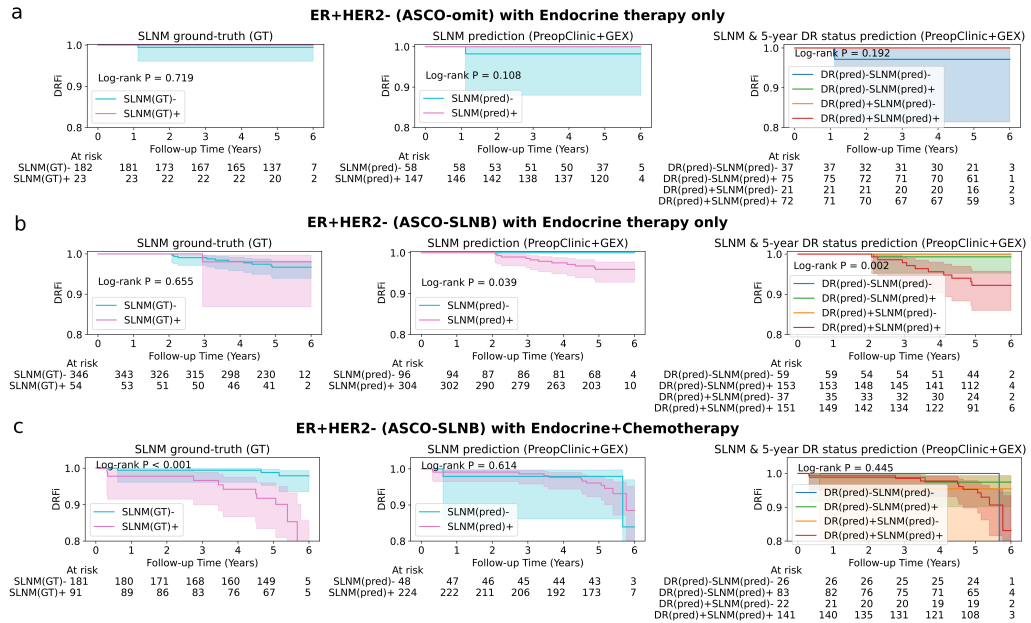

**Fig. S9:** Kaplan-Meier curves using DRFi as the endpoint, stratified by SLNM ground truth and GEX predictors.

(a) ER+HER2- (ASCO-SLNB) patients with endocrine therapy only

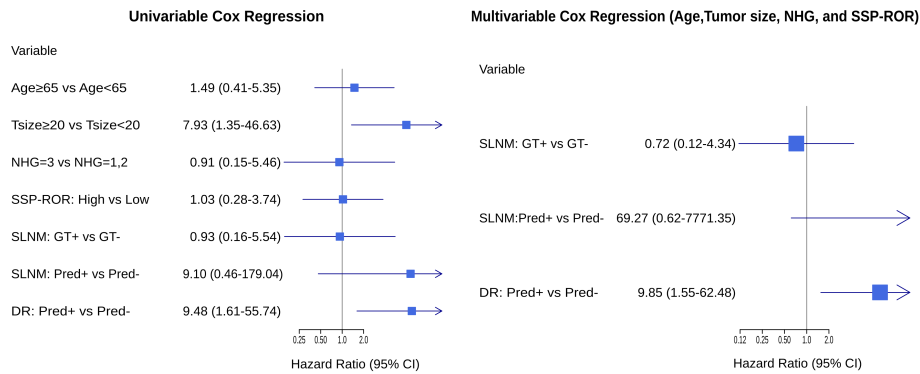

**Fig. S10:** Forest plots displaying hazard ratios of SLNM and DR predictions based on PreopClinic+GEX by univariable and multivariable (adjusted by age, tumor size, NHG and SSP-based ROR risk classification) Cox regression using the DRFi endpoint. SLNM, sentinel lymph node macro-metastasis; DR, distant recurrence-free; PreopClinic, preoperative clinicopathology; GEX, gene expression.

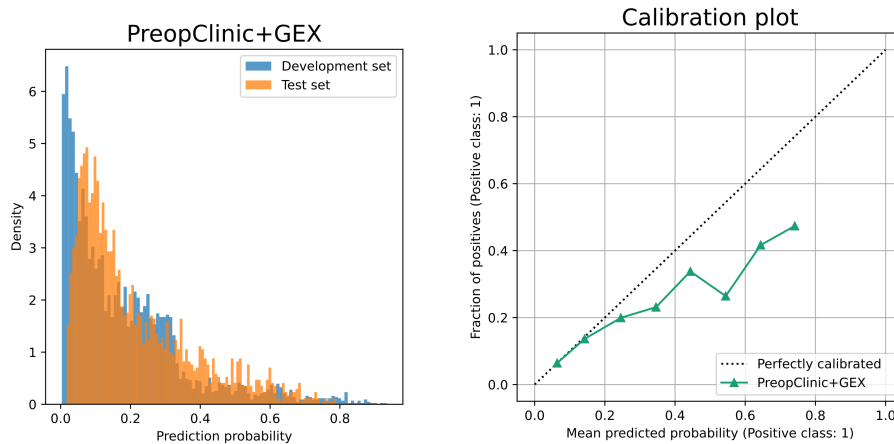

**Fig. S11:** Distribution plots and calibration curve of sentinel lymph node macro-metastasis (SLNM) prediction based on the combined model of PreopClinic+GEX. a) Distributions of the predicted SLNM probabilities in the development set and in the independent set. The dark orange depicts the overlap between the two distributions. b) Calibration curve of SLNM prediction. GEX data used all SCAN-B genes. GEX, gene expression analysis; PreopClinic, preoperative clinical data.

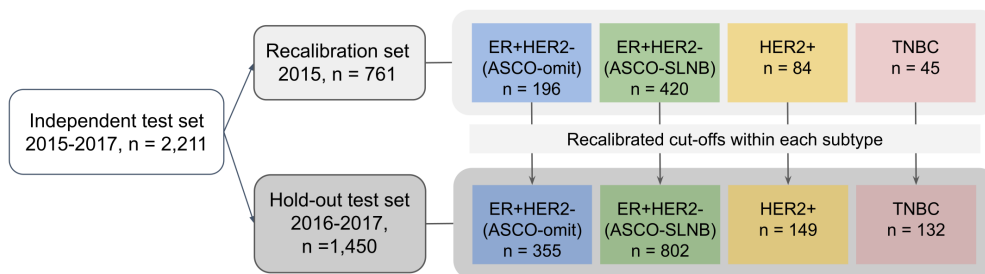

**Fig. S12:** Recalibration and hold-out splits of the independent test set for cut-off dependent analyses. There were 28 test samples identified as an unknown clinical subtype due to missing values. Patient characteristics of the recalibration set and hold-out test set are presented in Supplementary Table S3.

## References

- 36
- 37 [1] Sawilowsky SS. New effect size rules of thumb. *Journal of modern applied statistical*  
38 *methods*. 2009;8:597–599.
- 39 [2] Kim HY. Statistical notes for clinical researchers: Chi-squared test and Fisher’s exact  
40 test. *Restorative dentistry & endodontics*. 2017;42(2):152–155.
- 41 [3] Narbe U, Bendahl PO, Fernö M, Ingvar C, Dihge L, Rydén L. St Gallen 2019  
42 guidelines understage the axilla in lobular breast cancer: a population-based study.  
43 *British Journal of Surgery*. 2021;108(12):1465–1473.
- 44 [4] Sanchez-Vega F, Mina M, Armenia J, Chatila WK, Luna A, La KC, et al. Oncogenic  
45 signaling pathways in the cancer genome atlas. *Cell*. 2018;173(2):321–337.
- 46 [5] Brueffer C, Gladchuk S, Winter C, Vallon-Christersson J, Hegardt C, Häkkinen J,  
47 et al. The mutational landscape of the SCAN-B real-world primary breast cancer  
48 transcriptome. *EMBO molecular medicine*. 2020;12(10):e12118.
- 49 [6] Pedersen BS, Layer RM, Quinlan AR. Vcfanno: fast, flexible annotation of genetic  
50 variants. *Genome biology*. 2016;17(1):118.
- 51 [7] Lachmann A, Torre D, Keenan AB, Jagodnik KM, Lee HJ, Wang L, et al. Mas-  
52 sive mining of publicly available RNA-seq data from human and mouse. *Nature*  
53 *communications*. 2018;9(1):1366.

54 □
